# Supplementary material for: Thermal fluctuation-induced selective CO2 uptake of seemingly nonporous N,C-protected dipeptide crystals as elucidated by in situ X-ray crystallographic analysis
Source: Royal Society of Chemistry journal article supplement (doi:10.1039/d3ce01018j), 2024-01-01
Supplement: d3ce01018j3.pdf [file d3ce01018j3.pdf]

## Supplementary Information

Thermal Fluctuation-induced Selective CO<sub>2</sub> Uptake of Seemingly Nonporous *N,C*-protected Dipeptide Crystals as Elucidated by *in situ* X-ray Crystallographic Analysis

Kazuaki Yamanaka,<sup>a</sup> Ryusei Oketani,<sup>a,b</sup> Yuya Mori,<sup>a</sup> Takashi Sato,<sup>c</sup> Seiji Tsuzuki,<sup>d</sup> Hiroki Takahashi<sup>a</sup> and Hirohito Tsue<sup>\*a</sup>

<sup>a</sup> Graduate School of Human and Environmental Studies, Kyoto University, Yoshida-nihonmatsu-cho, Sakyo-ku, Kyoto 606-8501, Japan

<sup>b</sup> Graduate School of Engineering Science, Osaka University, 1-3 Machikaneyama, Toyonaka, Osaka 560-8531, Japan

<sup>c</sup> SBU ROD, Rigaku Corporation, 3-9-12 Matsubara-cho, Akishima, Tokyo 196-8666, Japan

<sup>d</sup> Department of Applied Physics, The University of Tokyo, 7-3-1 Hongo, Bunkyo-ku, Tokyo 113-8656, Japan

## Table of Contents

|                                                                                                |         |
|------------------------------------------------------------------------------------------------|---------|
| 1. Molecular crystals with seemingly nonporous crystal architecture                            | Page 2  |
| 2. General methods                                                                             | Page 2  |
| 3. Synthesis of <i>N,C</i> -protected dipeptides                                               | Page 3  |
| 4. NMR spectra                                                                                 | Page 5  |
| 5. Crystallography                                                                             | Page 8  |
| 6. Gas sorption isotherms of <b>1</b>                                                          | Page 11 |
| 7. SEM images of the crystals of <b>1</b> before and after CO <sub>2</sub> sorption experiment | Page 13 |
| 8. Theoretical calculations                                                                    | Page 14 |
| 9. References                                                                                  | Page 15 |

## 1. Molecular crystals with seemingly nonporous crystal architecture

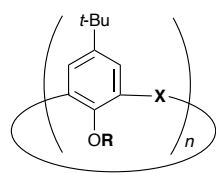

**calixarene:** X = CH<sub>2</sub>, R = H, n = 4 or 5 (ref. 6)

**thiacalixarene:** X = S or SO<sub>2</sub>, R = Me or H, n = 4 (ref. 11)

**azacalixarene:** X = NH, R = Me, n = 4 or 5 (ref. 14)

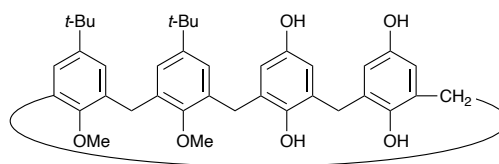

**p-tert-butylcalix[4]dihydroquinone** (ref. 6d)

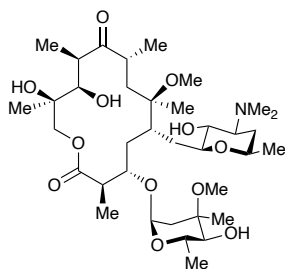

**clarithromycin** (ref. 7)

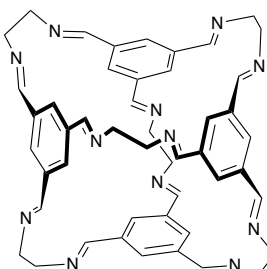

**molecular cage** (ref. 8)

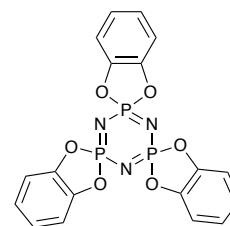

**phosphazene** (ref. 9)

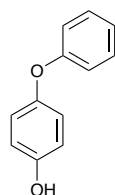

**4-phenoxyphenol** (ref. 10)

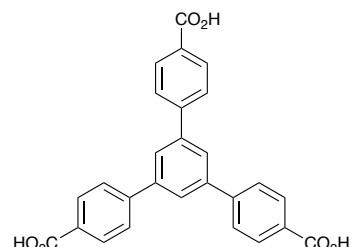

**1,3,5-triphenylbenzene** (ref. 12)

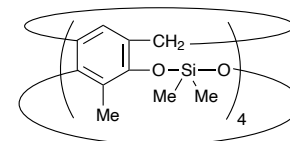

**cavitand** (ref. 13)

**Chart S1** Chemical structures of organic compounds depositing seemingly nonporous crystals. Reference numbers are identical to those listed in the main text.

## 2. General methods

All reagents and solvents were purchased from commercial suppliers and used without further purification. NMR spectra were recorded on a JEOL ECX-400 NMR spectrometer. Chemical shifts were reported in  $\delta$  ppm relative to tetramethylsilane (<sup>1</sup>H NMR) or chloroform-d (<sup>13</sup>C NMR), and signal multiplicities in <sup>1</sup>H NMR spectra are described as singlet (s), broad singlet (br), doublet (d), triplet (t), double doublet (dd) and multiplet (m). IR spectra were recorded on a Shimadzu IRSpirit-T spectrometer by using KBr tablets. Melting points were determined on a Shimadzu DSC-60. High-resolution mass spectrometry (HRMS) measurements were performed by using a Bruker micrOTOF II with ESI ionization method. Scanning electron microscope (SEM) studies were conducted on a Keyence VE-8800 instrument. Gas sorption isotherms were measured using a Shimadzu Gemini VII 2390 surface area analyzer.

### 3. Synthesis of *N,C*-protected dipeptides

#### Scheme S1 Synthesis of methyl *N*-(*tert*-butoxycarbonyl)-L-methionyl-L-alaninate (**1**)

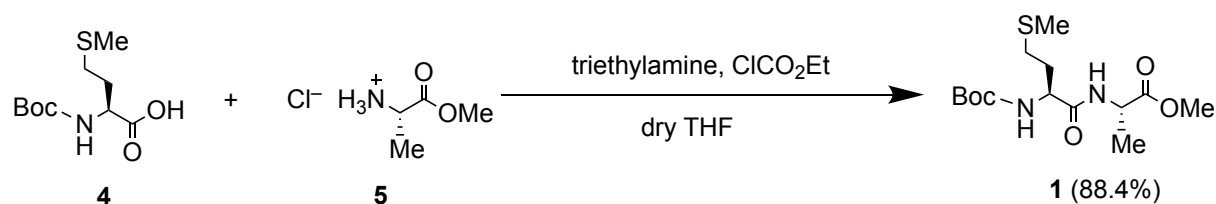

To a solution of *N*-(*tert*-butoxycarbonyl)-L-methionine (**4**, 1.00 g, 4.02 mmol) in dry THF (15 mL) at  $-15\text{ }^\circ\text{C}$ , triethylamine (2.5 mL, 18 mmol) and  $\text{ClCO}_2\text{Et}$  (0.70 mL, 7.4 mmol) were added under Ar atmosphere. After stirring for 10 min, a solution of **5** (0.840 g, 6.02 mmol) in dry DMF (15 mL) was added to the reaction mixture. After 15 min, the solvent was evaporated, and the residue was dissolved in ethyl acetate. The organic layer was washed with water and brine, and dried over  $\text{MgSO}_4$ . The solvent was evaporated under vacuum to give a colorless oil. It was dissolved in boiling hexane, and the solution was allowed to cool to room temperature. Colorless needle crystals of **1** (1.19 g, 88.4%) were obtained by filtration. mp  $87.0\text{ }^\circ\text{C}$ ;  $^1\text{H NMR}$  (400 MHz,  $\text{CDCl}_3$ ):  $\delta$  6.70 (br, 1H, NH), 5.20 (br, 1H, NH), 4.58 (quintet,  $J = 7.3\text{ Hz}$ , 1H,  $\text{NHCHCH}_3$ ), 4.30 (br, 1H,  $\text{NHCHCO}$ ), 3.75 (s, 3H, OMe), 2.60 (t,  $J = 7.2\text{ Hz}$ , 2H,  $\text{CH}_2\text{S}$ ), 2.12 (s, 3H, SMe), 2.10–2.03 (m, 1H,  $\text{CH}_2\text{CH}_2\text{S}$ ), 1.99–1.90 (m, 1H,  $\text{CH}_2\text{CH}_2\text{S}$ ), 1.48 (s, 9H, *t*-Bu), 1.42 (d,  $J = 7.2\text{ Hz}$ , 3H,  $\text{CHCH}_3$ );  $^{13}\text{C NMR}$  (100 MHz,  $\text{CDCl}_3$ ):  $\delta$  173.0, 171.1, 155.5, 80.1, 53.1, 52.4, 48.0, 31.6, 29.9, 28.2, 18.1, 15.1; IR (KBr)  $\nu_{\text{max}}$ : 3288, 3074, 2981, 1755, 1679, 1652, 1535, 1459, 1393, 1367, 1300, 1270, 1256, 1201, 1160, 1050  $\text{cm}^{-1}$ ; HRMS (ESI): Calcd for  $\text{C}_{14}\text{H}_{26}\text{N}_2\text{O}_5\text{SNa}$   $[\text{M}+\text{Na}]^+$  357.1455; found 357.1474.

#### Scheme S2 Synthesis of methyl *N*-(*tert*-butoxycarbonyl)-L-methionyl-L-valinate (**2**) and methyl *N*-(*tert*-butoxycarbonyl)-L-methionyl-L-leucinate (**3**)

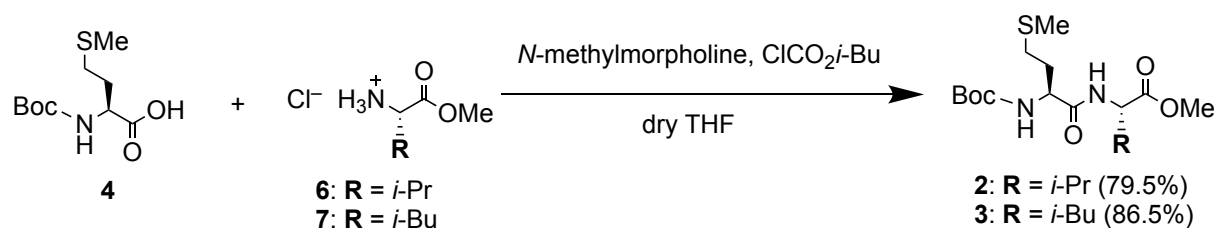

To a mixture of **4** (2.36 g, 9.48 mmol) and *N*-methylmorpholine (1.1 mL, 10 mmol) in dry THF (40 mL) at  $-15\text{ }^\circ\text{C}$ , isobutyl chloroformate (1.3 mL, 9.9 mmol) was added and then stirred for 1 h under Ar atmosphere. Aside from it, **6** (1.71 g, 10.2 mmol) was neutralized with triethylamine (3.0 mL, 22 mmol) in methanol (6 mL). After evaporation under reduced pressure, the resultant residue was suspended in dry THF (15 mL). The suspension was added to the reaction mixture, which was allowed to warm to room temperature. After stirring for 4 h, the solvent was evaporated, and the residue was dissolved in

ethyl acetate. The organic layer was washed with saturated NaHCO<sub>3</sub> solution and brine, and dried over MgSO<sub>4</sub>. The solvent was removed by evaporation to give a white solid. It was dissolved in boiling hexane, and the solution was allowed to cool to room temperature. Colorless needle crystals of **2** (2.73 g, 79.5%) were obtained by filtration. mp 125.2 °C; <sup>1</sup>H NMR (400 MHz, CDCl<sub>3</sub>): δ 6.69 (br, 1H, NH), 5.17 (br, 1H, NH), 4.53 (dd, *J* = 8.0 Hz, 4.4 Hz, 1H, NHCH(*i*-Pr)CO), 4.31 (br, 1H, NHCHCO), 3.74 (s, 3H, OMe), 2.61 (t, *J* = 7.2 Hz, 2H, CH<sub>2</sub>S), 2.22–2.16 (m, 1H, CH(CH<sub>3</sub>)<sub>2</sub>), 2.13 (s, 3H, SMe), 2.10–2.03 (m, 1H, CH<sub>2</sub>CH<sub>2</sub>S), 2.01–1.94 (m, 1H, CH<sub>2</sub>CH<sub>2</sub>S), 1.45 (s, 9H, *t*-Bu), 0.93 (dd, *J* = 13.6 Hz, 6.8 Hz, 6H, CH(CH<sub>3</sub>)<sub>2</sub>); <sup>13</sup>C NMR (100 MHz, CDCl<sub>3</sub>): δ 172.0, 171.5, 155.5, 80.0, 57.1, 53.1, 52.1, 31.1, 31.0, 30.0, 28.2, 18.9, 17.5, 15.0; IR (KBr)  $\nu_{\max}$ : 3308, 3055, 2979, 1754, 1682, 1652, 1538, 1447, 1436, 1392, 1365, 1296, 1256, 1174, 1156, 1051 cm<sup>-1</sup>; HRMS (ESI): Calcd for C<sub>16</sub>H<sub>30</sub>N<sub>2</sub>O<sub>5</sub>SNa [M+Na]<sup>+</sup> 385.1768; found 385.1769.

Synthesis of **3** was carried out according to the above-mentioned procedure for **2** by using **4** (1.97 g, 7.90 mmol), **7** (1.44 g, 7.92 mmol), *N*-methylmorpholine (1.0 mL, 9.1 mmol), isobutyl chloroformate (1.2 mL, 8.8 mmol), and triethylamine (1.3 mL, 9.3 mmol) to give colorless needle crystals of **3** (2.57 g, 86.5%). mp 108.8 °C; <sup>1</sup>H NMR (400 MHz, CDCl<sub>3</sub>): δ 6.52 (br, 1H, NH), 5.15 (br, 1H, NH), 4.61 (m, 1H, NHCH(*i*-Bu)CO), 4.28 (br, 1H, NHCHCO), 3.75 (s, 3H, OMe), 2.61 (t, *J* = 6.8 Hz), 2.12 (s, 3H, SMe), 2.10–2.03 (m, 1H, CH<sub>2</sub>CH<sub>2</sub>S), 1.99–1.92 (m, 1H, CH<sub>2</sub>CH<sub>2</sub>S), 1.70–1.63 (m, 2H, CH<sub>2</sub>CH), 1.60–1.54 (m, 1H, CH<sub>2</sub>CH), 1.45 (s, 9H, *t*-Bu), 0.93 (d, *J* = 6.0 Hz, 6H, CH(CH<sub>3</sub>)<sub>2</sub>); <sup>13</sup>C NMR (100 MHz, CDCl<sub>3</sub>): δ 173.0, 171.3, 155.4, 79.9, 52.9, 52.2, 50.6, 41.0, 31.4, 29.8, 28.2, 24.6, 22.7, 21.6, 15.0; IR (KBr)  $\nu_{\max}$ : 3338, 3280, 3074, 2972, 1759, 1682, 1659, 1549, 1520, 1445, 1392, 1366, 1296, 1266, 1253, 1157, 1045 cm<sup>-1</sup>; HRMS (ESI): Calcd for C<sub>17</sub>H<sub>32</sub>N<sub>2</sub>O<sub>5</sub>SNa [M+Na]<sup>+</sup> 399.1924; found 399.1925.

#### 4. NMR spectra

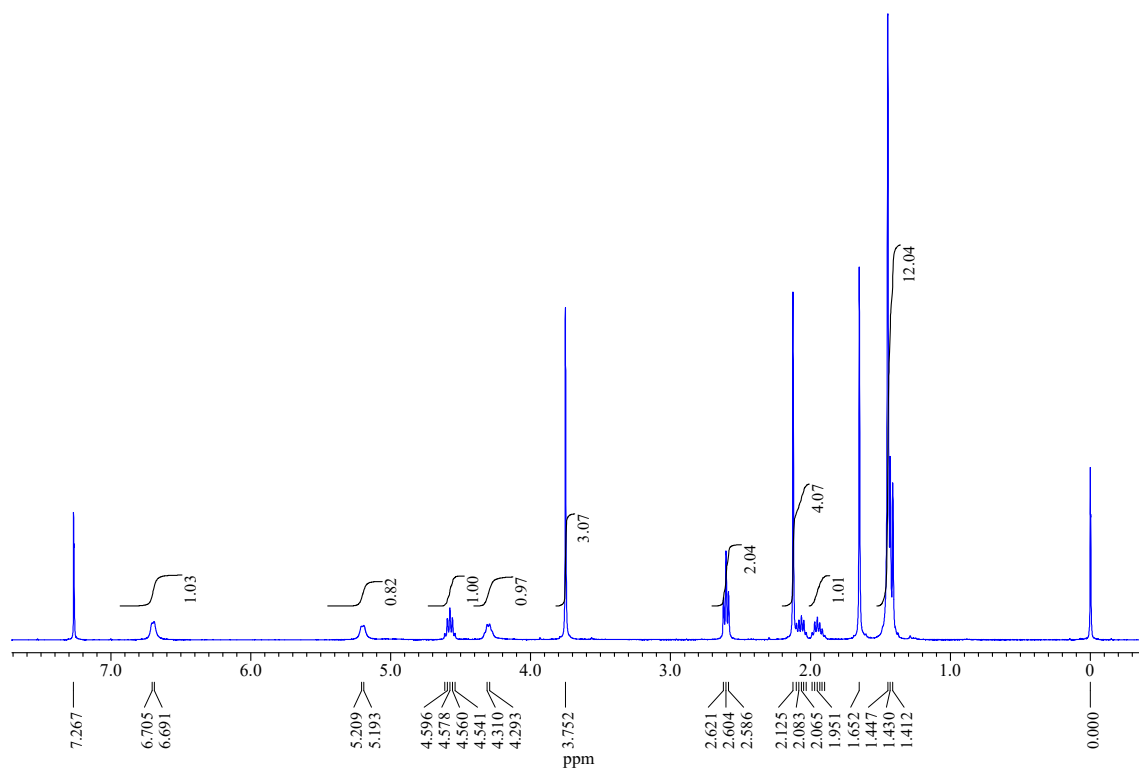

**Fig. S1** <sup>1</sup>H NMR spectrum of **1** in CDCl<sub>3</sub>

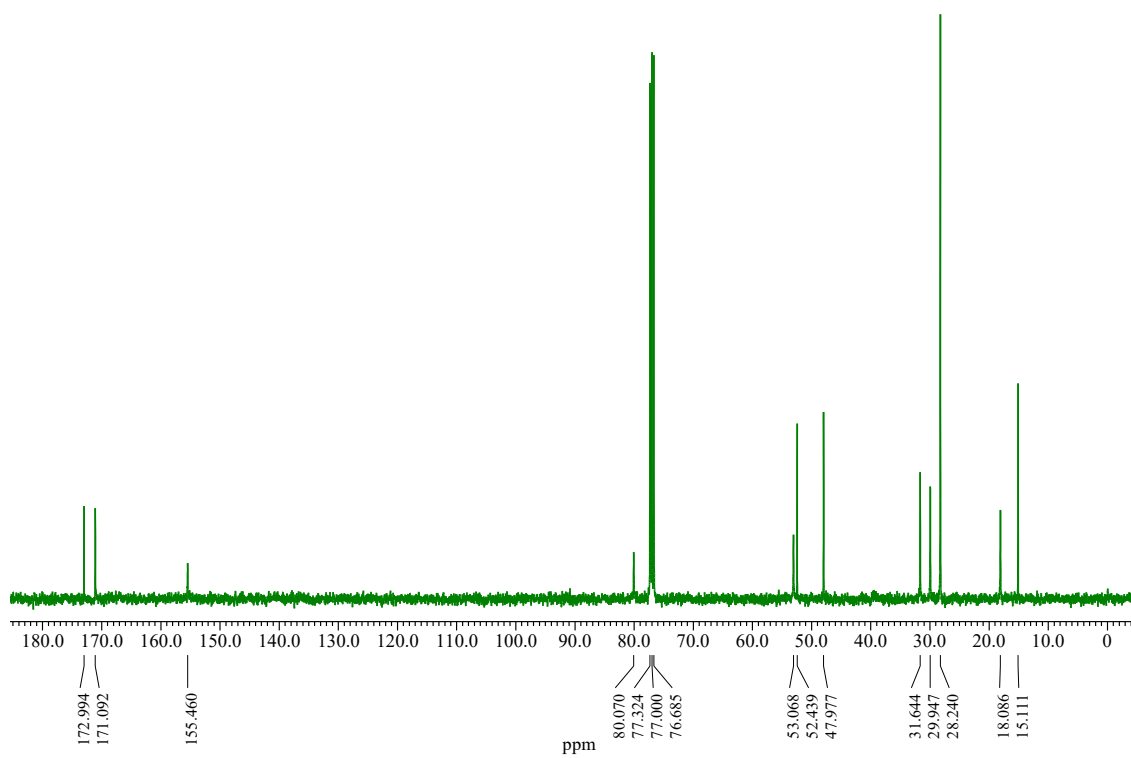

**Fig. S2** <sup>13</sup>C NMR spectrum of **1** in CDCl<sub>3</sub>

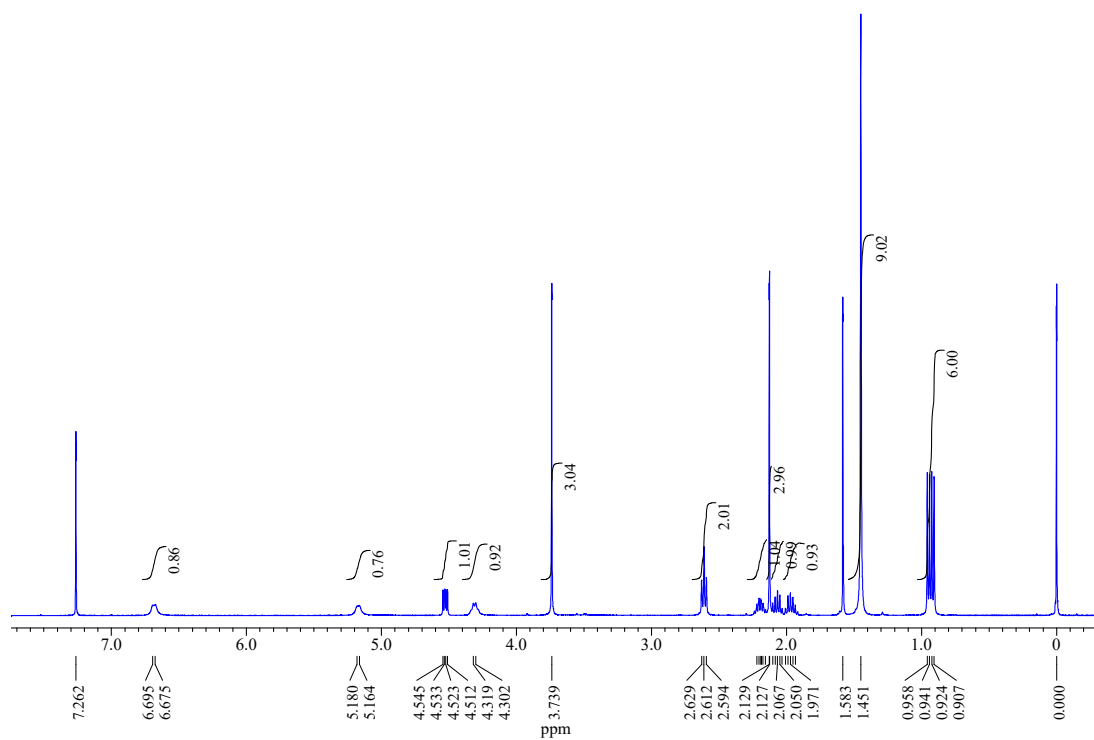

**Fig. S3**  $^1\text{H}$  NMR spectrum of **2** in  $\text{CDCl}_3$

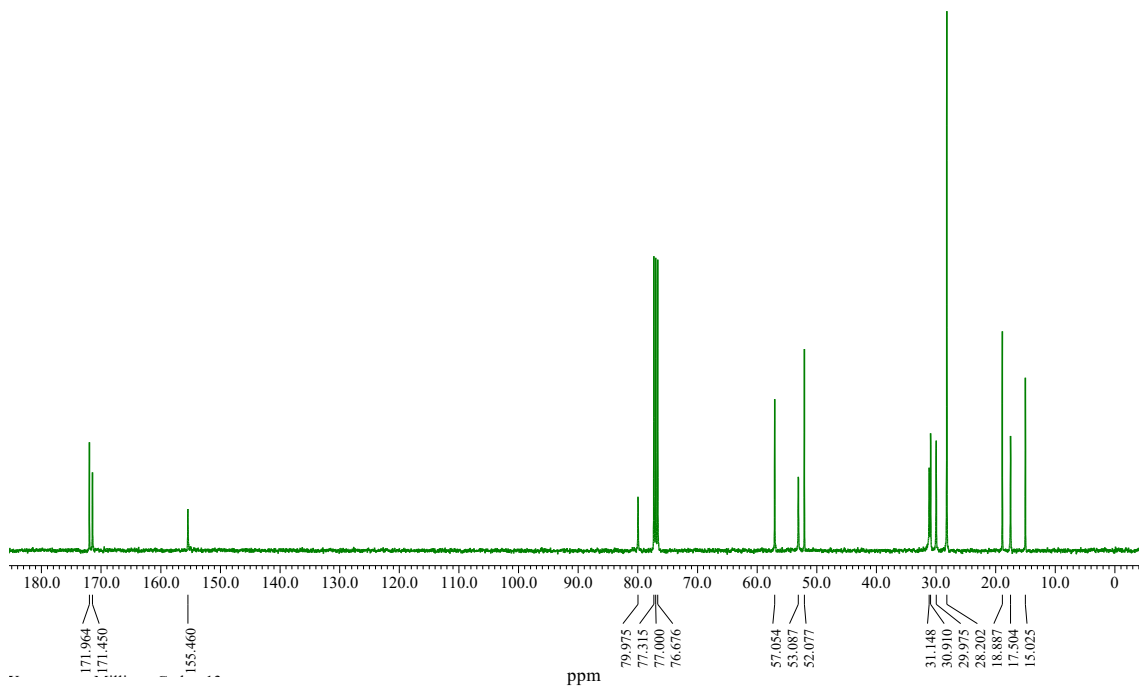

**Fig. S4**  $^{13}\text{C}$  NMR spectrum of **2** in  $\text{CDCl}_3$

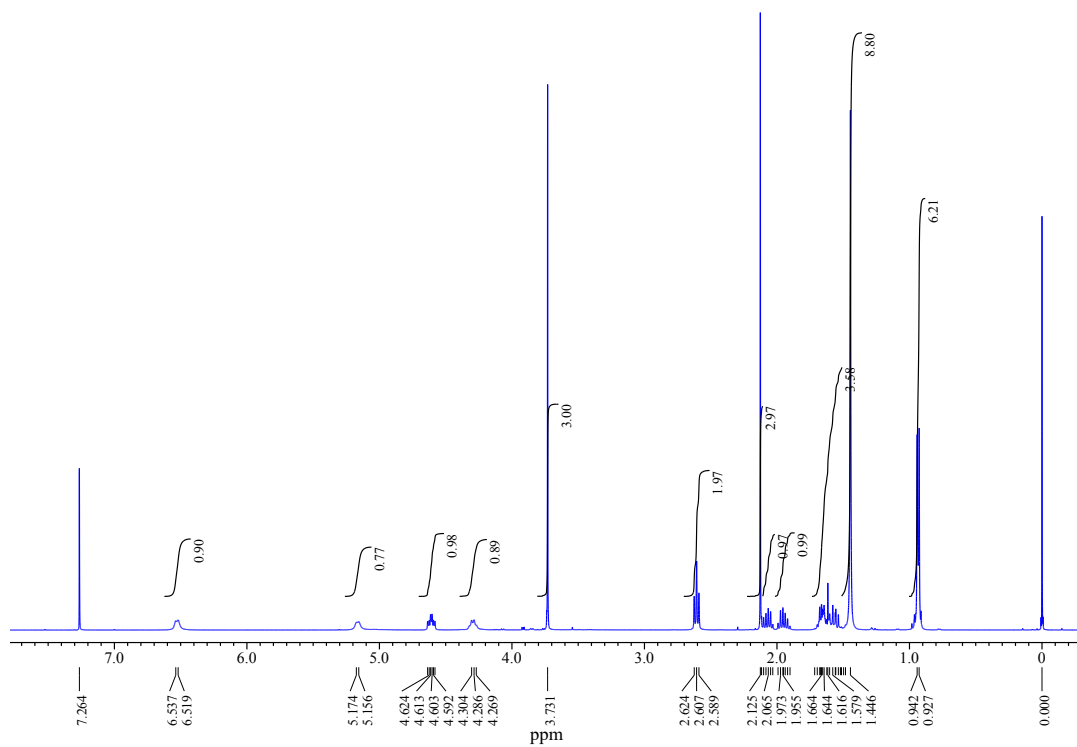

Fig. S5  $^1\text{H}$  NMR spectrum of **3** in  $\text{CDCl}_3$

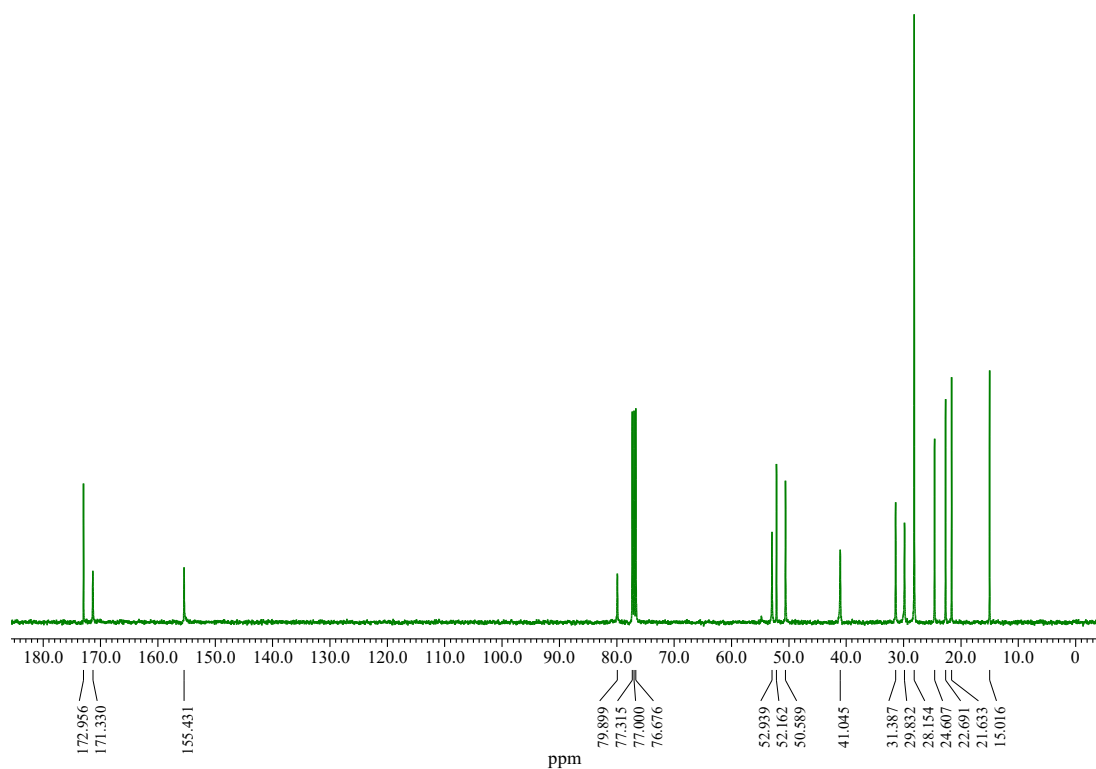

Fig. S6  $^{13}\text{C}$  NMR spectrum of **3** in  $\text{CDCl}_3$

## 5. Crystallography

Single crystals of **1–3** were grown by cooling the boiling solutions in hexane. X-ray diffraction data of **1–3** were collected using a Rigaku Saturn724+ CCD area detector diffractometer [graphite-monochromated Mo K $\alpha$  radiation ( $\lambda = 0.71073 \text{ \AA}$ );  $\omega$  scans]. All the structures were solved by direct methods using SIR97<sup>S1</sup> and refined on  $F^2$  with all data using SHELXL-2014/7.<sup>S2</sup> All non-hydrogen atoms were refined anisotropically, and the hydrogen atoms were refined isotropically or using the riding model. All calculations were performed using CrysAlis<sup>Pro</sup> S<sup>3</sup> and Yadokari-XG 2009.<sup>S4</sup> Crystallographic data for the structures reported in the paper have been deposited with the Cambridge Crystallographic Data Centre and allocated the deposition numbers CCDC 2298630–2298633, 2342412, and 2342427. Supplementary Movies S1 and S2 for explaining the crystal structures of **1** in the absence and presence of CO<sub>2</sub> were prepared by using UCSF Chimera ver. 1.7.<sup>S5</sup>

**Table S1** Crystallographic data of *N,C*-protected dipeptide crystals

| Compound                                                                                | <b>1</b>                                                        | <b>1</b>                                                        | <b>1</b>                                                        | <b>1·0.25 CO<sub>2</sub></b>                                          |
|-----------------------------------------------------------------------------------------|-----------------------------------------------------------------|-----------------------------------------------------------------|-----------------------------------------------------------------|-----------------------------------------------------------------------|
|                                                                                         | 15 °C                                                           | −35 °C                                                          | −85 °C                                                          | −85 °C                                                                |
| Chemical formula                                                                        | C <sub>14</sub> H <sub>26</sub> N <sub>2</sub> O <sub>5</sub> S | C <sub>14</sub> H <sub>26</sub> N <sub>2</sub> O <sub>5</sub> S | C <sub>14</sub> H <sub>26</sub> N <sub>2</sub> O <sub>5</sub> S | C <sub>14.25</sub> H <sub>26</sub> N <sub>2</sub> O <sub>5.50</sub> S |
| Formula mass                                                                            | 334.44                                                          | 334.44                                                          | 334.44                                                          | 345.61                                                                |
| Crystal system                                                                          | Hexagonal                                                       | Hexagonal                                                       | Hexagonal                                                       | Hexagonal                                                             |
| Space group                                                                             | <i>P</i> 6 <sub>5</sub>                                         | <i>P</i> 6 <sub>5</sub>                                         | <i>P</i> 6 <sub>5</sub>                                         | <i>P</i> 6 <sub>5</sub>                                               |
| <i>a</i> / Å                                                                            | 11.287(1)                                                       | 11.2333(9)                                                      | 11.1876(8)                                                      | 11.239(4)                                                             |
| <i>b</i> / Å                                                                            | 11.287(1)                                                       | 11.2333(9)                                                      | 11.1876(8)                                                      | 11.239(4)                                                             |
| <i>c</i> / Å                                                                            | 27.130(2)                                                       | 27.046(2)                                                       | 26.954(2)                                                       | 27.039(1)                                                             |
| $\alpha$ / °                                                                            | 90                                                              | 90                                                              | 90                                                              | 90                                                                    |
| $\beta$ / °                                                                             | 90                                                              | 90                                                              | 90                                                              | 90                                                                    |
| $\gamma$ / °                                                                            | 120                                                             | 120                                                             | 120                                                             | 120                                                                   |
| Unit cell volume / Å <sup>3</sup>                                                       | 2993.1(5)                                                       | 2955.6(4)                                                       | 2921.6(5)                                                       | 2958(2)                                                               |
| Temperature / K                                                                         | 288(2)                                                          | 238(2)                                                          | 188(2)                                                          | 188(2)                                                                |
| No. of formula units per cell, <i>Z</i>                                                 | 6                                                               | 6                                                               | 6                                                               | 6                                                                     |
| No. of reflections measured                                                             | 29458                                                           | 28134                                                           | 27857                                                           | 9839                                                                  |
| No. of independent reflections                                                          | 6050                                                            | 5962                                                            | 5911                                                            | 4090                                                                  |
| <i>R</i> <sub>int</sub>                                                                 | 0.0732                                                          | 0.0677                                                          | 0.0519                                                          | 0.0390                                                                |
| Final <i>R</i> <sub>1</sub> values ( <i>I</i> > 2 $\sigma$ ( <i>I</i> ))                | 0.0859                                                          | 0.0815                                                          | 0.0774                                                          | 0.0525                                                                |
| Final w <i>R</i> ( <i>F</i> <sup>2</sup> ) values ( <i>I</i> > 2 $\sigma$ ( <i>I</i> )) | 0.1623                                                          | 0.1848                                                          | 0.1692                                                          | 0.1424                                                                |
| Final <i>R</i> <sub>1</sub> values (all data)                                           | 0.2396                                                          | 0.2013                                                          | 0.1442                                                          | 0.1010                                                                |
| Final w <i>R</i> ( <i>F</i> <sup>2</sup> ) values (all data)                            | 0.2175                                                          | 0.2460                                                          | 0.1984                                                          | 0.1886                                                                |
| <i>S</i>                                                                                | 1.0392                                                          | 0.9909                                                          | 1.0289                                                          | 0.8476                                                                |



**Table S1** continued

| Compound                                                                       | <b>2</b>                                                        | <b>3</b>                                                        |
|--------------------------------------------------------------------------------|-----------------------------------------------------------------|-----------------------------------------------------------------|
|                                                                                | –85 °C                                                          | –85 °C                                                          |
| Chemical formula                                                               | C <sub>16</sub> H <sub>30</sub> N <sub>2</sub> O <sub>5</sub> S | C <sub>17</sub> H <sub>32</sub> N <sub>2</sub> O <sub>5</sub> S |
| Formula mass                                                                   | 362.49                                                          | 376.52                                                          |
| Crystal system                                                                 | Hexagonal                                                       | Hexagonal                                                       |
| Space group                                                                    | <i>P6<sub>5</sub></i>                                           | <i>P6<sub>5</sub></i>                                           |
| <i>a</i> / Å                                                                   | 11.3887(8)                                                      | 11.4929(7)                                                      |
| <i>b</i> / Å                                                                   | 11.3887(8)                                                      | 11.4929(7)                                                      |
| <i>c</i> / Å                                                                   | 27.3424(2)                                                      | 27.929(2)                                                       |
| $\alpha$ / °                                                                   | 90                                                              | 90                                                              |
| $\beta$ / °                                                                    | 90                                                              | 90                                                              |
| $\gamma$ / °                                                                   | 120                                                             | 120                                                             |
| Unit cell volume / Å <sup>3</sup>                                              | 3071.3(4)                                                       | 3194.8(3)                                                       |
| Temperature / K                                                                | 188(2)                                                          | 188(2)                                                          |
| No. of formula units per cell, <i>Z</i>                                        | 6                                                               | 6                                                               |
| No. of reflections measured                                                    | 29375                                                           | 30468                                                           |
| No. of independent reflections                                                 | 5754                                                            | 6393                                                            |
| <i>R</i> <sub>int</sub>                                                        | 0.0886                                                          | 0.0614                                                          |
| Final <i>R</i> <sub>1</sub> values ( <i>I</i> > 2σ( <i>I</i> ))                | 0.0754                                                          | 0.0732                                                          |
| Final w <i>R</i> ( <i>F</i> <sup>2</sup> ) values ( <i>I</i> > 2σ( <i>I</i> )) | 0.1414                                                          | 0.1499                                                          |
| Final <i>R</i> <sub>1</sub> values (all data)                                  | 0.1359                                                          | 0.1203                                                          |
| Final w <i>R</i> ( <i>F</i> <sup>2</sup> ) values (all data)                   | 0.1646                                                          | 0.1700                                                          |
| <i>S</i>                                                                       | 1.0308                                                          | 1.0291                                                          |

**Table S2** Unnormalized and normalized equivalent isotropic displacement factors ( $U_{\text{eq}}$ )<sup>a,b</sup> of **1** at 15, –35, and –85 °C and those of **2** and **3** at –85 °C

| Compound | <b>1</b>             | <b>1</b>               | <b>1</b>               | <b>2</b>               | <b>3</b>               |
|----------|----------------------|------------------------|------------------------|------------------------|------------------------|
|          | 15 °C                | –35 °C                 | –85 °C                 | –85 °C                 | –85 °C                 |
| C1       | 0.095(2)<br>[1.7(1)] | 0.084(2)<br>[1.8(1)]   | 0.080(2)<br>[2.0(1)]   | 0.0400(9)<br>[1.59(5)] | 0.0303(6)<br>[1.29(4)] |
| C2       | 0.102(2)<br>[1.8(1)] | 0.089(2)<br>[1.9(1)]   | 0.080(1)<br>[2.0(1)]   | 0.0360(8)<br>[1.43(5)] | 0.0255(6)<br>[1.09(3)] |
| C3       | 0.185(4)<br>[3.3(1)] | 0.162(4)<br>[3.5(1)]   | 0.146(3)<br>[3.7(1)]   | 0.048(1)<br>[1.9(1)]   | 0.0280(6)<br>[1.20(4)] |
| C4       | 0.065(1)<br>[1.2(1)] | 0.056(1)<br>[1.2(1)]   | 0.0479(8)<br>[1.22(3)] | 0.0261(6)<br>[1.04(3)] | 0.0224(5)<br>[0.96(3)] |
| C5       | 0.057(1)<br>[1.0(1)] | 0.0463(9)<br>[1.00(3)] | 0.0393(7)<br>[1.00(3)] | 0.0252(6)<br>[1.00(3)] | 0.0234(5)<br>[1.00(3)] |
| C6       | 0.076(1)<br>[1.3(1)] | 0.063(1)<br>[1.36(4)]  | 0.0529(9)<br>[1.35(3)] | 0.0323(7)<br>[1.28(4)] | 0.0325(7)<br>[1.39(4)] |
| C7       | 0.098(2)<br>[1.7(1)] | 0.081(2)<br>[1.8(1)]   | 0.066(1)<br>[1.7(1)]   | 0.0382(8)<br>[1.52(5)] | 0.0432(8)<br>[1.85(5)] |
| C8       | 0.154(3)<br>[2.7(1)] | 0.133(3)<br>[2.87(9)]  | 0.117(2)<br>[2.98(7)]  | 0.063(1)<br>[2.5(1)]   | 0.076(2)<br>[3.3(1)]   |
| C9       | 0.200(5)<br>[3.5(1)] | 0.175(5)<br>[3.8(1)]   | 0.163(4)<br>[4.2(1)]   | 0.099(2)<br>[3.9(1)]   | 0.072(2)<br>[3.1(1)]   |
| C10      | 0.073(1)<br>[1.3(1)] | 0.064(1)<br>[1.4(1)]   | 0.058(1)<br>[1.5(1)]   | 0.0307(7)<br>[1.22(4)] | 0.0269(6)<br>[1.15(4)] |
| C11      | 0.129(3)<br>[2.3(1)] | 0.112(3)<br>[2.42(8)]  | 0.102(2)<br>[2.60(7)]  | 0.0406(9)<br>[1.61(5)] | 0.0379(8)<br>[1.62(5)] |
| C12      | 0.179(4)<br>[3.1(1)] | 0.152(4)<br>[3.3(1)]   | 0.131(3)<br>[3.3(1)]   | 0.068(2)<br>[2.7(1)]   | 0.117(3)<br>[5.0(2)]   |
| C13      | 0.262(7)<br>[4.6(2)] | 0.247(8)<br>[5.3(2)]   | 0.252(7)<br>[6.4(2)]   | 0.061(1)<br>[2.4(1)]   | 0.067(1)<br>[2.9(1)]   |
| C14      | 0.301(9)<br>[5.3(2)] | 0.28(1)<br>[6.1(3)]    | 0.241(7)<br>[6.1(2)]   | 0.067(1)<br>[2.7(1)]   | 0.119(3)<br>[5.1(2)]   |
| C15      | —                    | —                      | —                      | 0.067(1)<br>[2.7(1)]   | 0.0288(6)<br>[1.23(4)] |
| C16      | —                    | —                      | —                      | 0.087(2)<br>[3.5(1)]   | 0.0433(8)<br>[1.85(5)] |
| C17      | —                    | —                      | —                      | —                      | 0.0433(8)<br>[1.85(5)] |

<sup>a</sup> The  $U_{\text{eq}}$  values ( $\text{\AA}^2$ ) of the constituent carbon atoms were normalized by using those of the asymmetric carbon atoms (C5) of each methionine moiety as a reference. <sup>b</sup> Normalized  $U_{\text{eq}}$  values are shown in the square brackets.

## 6. Gas sorption isotherms of **1**

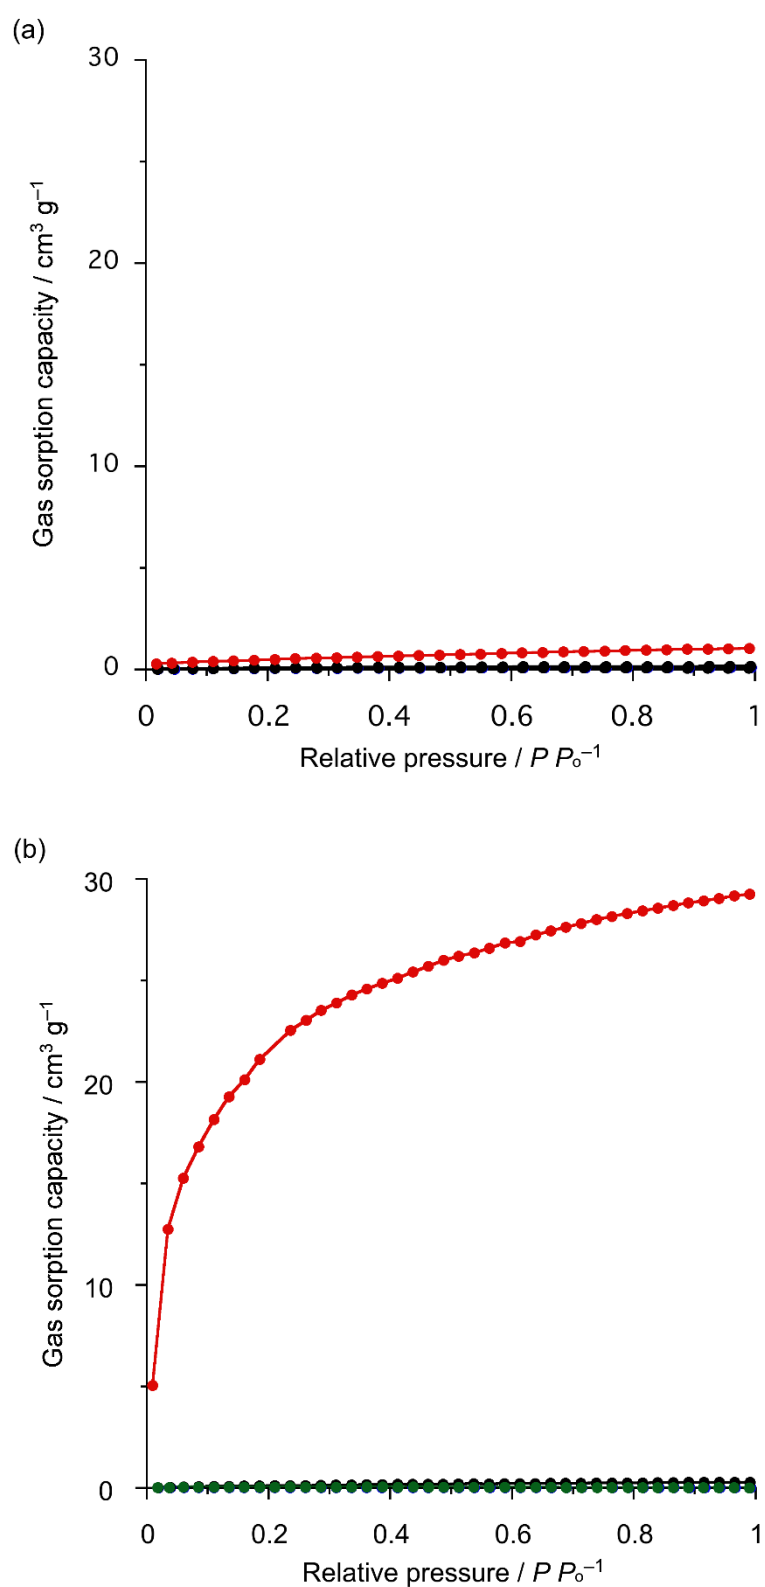

**Fig. S7** Gas sorption isotherms of **1** for N<sub>2</sub>, O<sub>2</sub>, Ar, and CO<sub>2</sub> at (a) 20 °C and (b) -78 °C ( $P_0 = 760$  mmHg). Isotherms for N<sub>2</sub>, O<sub>2</sub>, Ar, and CO<sub>2</sub> are shown by blue, black, green, and red closed circles, respectively.

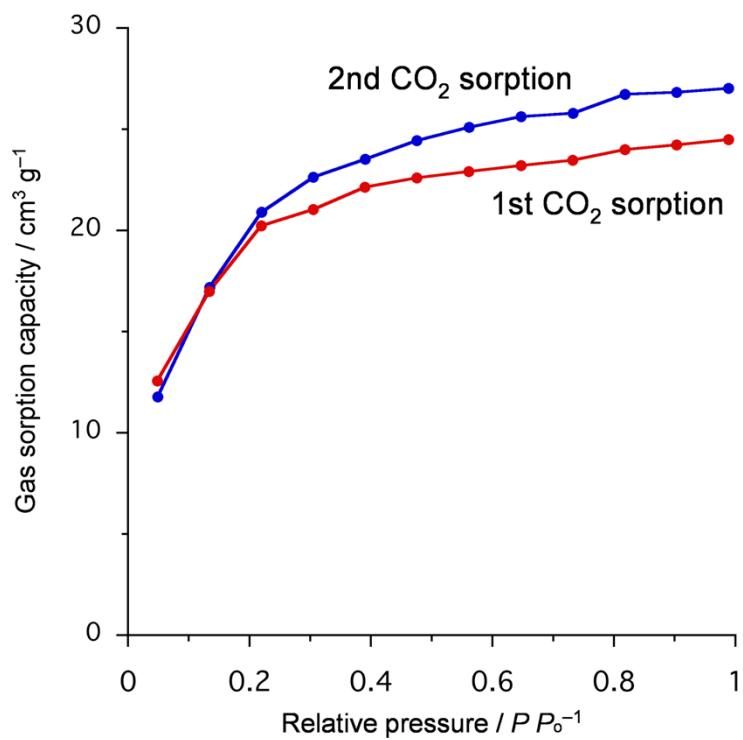

**Fig. S8** First and second CO<sub>2</sub> sorption isotherms of **1** in two consecutive CO<sub>2</sub> sorption experiments at –78 °C ( $P_0 = 760$  mmHg). Single crystals of **1**, obtained from a different recrystallization batch from that applied to Figs. 4 and S7, were used to record the two consecutive CO<sub>2</sub> sorption isotherms.

## 7. SEM images of the crystals of **1** before and after CO<sub>2</sub> sorption experiment

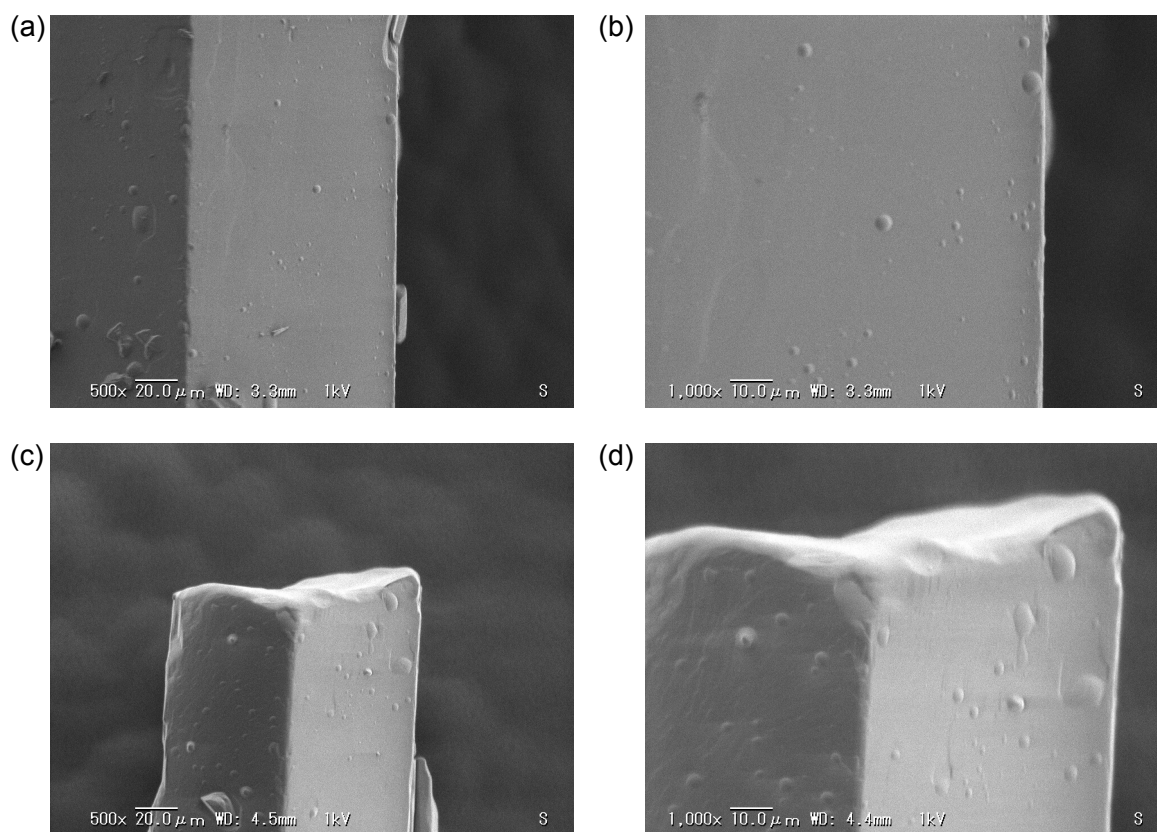

**Fig. S9** SEM images of the crystals of **1** (a,b) before and (c,d) after they were subjected to CO<sub>2</sub> sorption experiment. Magnification: (a,c) 500x, (b,d) 1,000x.

## 8. Theoretical calculations

As mentioned in the main text, the main chain of **1** with a smaller occupancy is assignable to the CO<sub>2</sub> sorption state of **1**, and its atomic coordinates were extracted from the crystallographic data of **1**·0.25 CO<sub>2</sub>. The atomic coordinates of hydrogen atoms were optimized under periodic boundary conditions using the fixed lattice. The DMol<sup>3</sup> module implemented in BIOVIA Materials Studio 2017 software was used for the optimization. The PBE functional, DND basis set, and Grimme's D2 dispersion correction were used for the calculations.

*Ab initio* calculations were then carried out to evaluate intermolecular interaction energies using the optimized structures. The Gaussian 16 program (Revision C.01)<sup>S6</sup> was used for the *ab initio* calculations. Electron correlation was corrected by the MP2 method. The aug-cc-pVDZ basis set was used for the calculations of intermolecular interaction energies. The basis set superposition error was corrected by the counterpoise method. Total intermolecular interaction energy ( $E_{\text{int}}$ ) between CO<sub>2</sub> and each adjacent molecule of **1** was calculated at the MP2 level. The Hartree-Fock level interaction energies ( $E_{\text{HF}}$ ) was also calculated.

GDMA ver. 2.2.03 program<sup>S7</sup> was used to calculate distributed multipole of each molecule on all atoms up to hexadecapole by using the wave functions obtained at the MP2/aug-cc-pVDZ level. Orient ver. 4.8.31 program<sup>S8</sup> was employed to calculate electrostatic ( $E_{\text{es}}$ ) and induction energies ( $E_{\text{ind}}$ ). The  $E_{\text{es}}$  was calculated as the interactions between distributed multipoles. The  $E_{\text{ind}}$  was calculated as the interactions between the polarizable sites and the electric field produced by the distributed multipole. For the calculations of  $E_{\text{ind}}$ , the following values of polarizability were used; C: 10, H: 3, N: 8, O: 6, and S: 20 a.u. The effect of electron correlation ( $E_{\text{corr}} = E_{\text{int}} - E_{\text{HF}}$ ) is mainly the contributions of the dispersion interactions. The short-range interaction energy ( $E_{\text{short}}$ ), that is comprised of exchange repulsion and charge transfer interaction, was calculated as the difference between the  $E_{\text{HF}}$  and the sum of  $E_{\text{es}}$  and  $E_{\text{ind}}$ , namely  $E_{\text{short}} = E_{\text{HF}} - E_{\text{es}} - E_{\text{ind}}$ .

## 9. References

- S1 A. Altomare, M. C. Burla, M. Camalli, G. L. Cascarano, C. Giacovazzo, A. Guagliardi, A. G. G. Moliterni, G. Polidori and R. Spagna, *J. Appl. Crystallogr.*, 1999, **32**, 115–119.
- S2 G. M. Sheldrick, *Acta Crystallogr., Sect. C*, 2015, **71**, 3–8.
- S3 CrysAlis PRO, Oxford Diffraction Ltd., Yarnton, England, 2009.
- S4 C. Kabuto, S. Akine, T. Nemoto and E. Kwon, *J. Cryst. Soc. Jpn.*, 2009, **51**, 218–224.
- S5 (a) E. F. Pettersen, T. D. Goddard, C. C. Huang, G. S. Couch, D. M. Greenblatt, E. C. Meng and T. E. Ferrin., *J. Comput. Chem.*, 2004, **25**, 1605–1612; (b) <https://www.cgl.ucsf.edu/chimera>.
- S6 M. J. Frisch, G. W. Trucks, H. B. Schlegel, G. E. Scuseria, M. A. Robb, J. R. Cheeseman, G. Scalmani, V. Barone, G. A. Petersson, H. Nakatsuji, X. Li, M. Caricato, A. V. Marenich, J. Bloino, B. G. Janesko, R. Gomperts, B. Mennucci, H. P. Hratchian, J. V. Ortiz, A. F. Izmaylov, J. L. Sonnenberg, D. Williams-Young, F. Ding, F. Lipparini, F. Egidi, J. Goings, B. Peng, A. Petrone, T. Henderson, D. Ranasinghe, V. G. Zakrzewski, J. Gao, N. Rega, G. Zheng, W. Liang, M. Hada, M. Ehara, K. Toyota, R. Fukuda, J. Hasegawa, M. Ishida, T. Nakajima, Y. Honda, O. Kitao, H. Nakai, T. Vreven, K. Throssell, J. A. Montgomery, Jr., J. E. Peralta, F. Ogliaro, M. J. Bearpark, J. J. Heyd, E. N. Brothers, K. N. Kudin, V. N. Staroverov, T. A. Keith, R. Kobayashi, J. Normand, K. Raghavachari, A. P. Rendell, J. C. Burant, S. S. Iyengar, J. Tomasi, M. Cossi, J. M. Millam, M. Klene, C. Adamo, R. Cammi, J. W. Ochterski, R. L. Martin, K. Morokuma, O. Farkas, J. B. Foresman and D. J. Fox, Gaussian, Inc., Wallingford CT, 2019.
- S7 A. J. Stone, *J. Chem. Theory Comput.*, 2005, **1**, 1128–1132.
- S8 A. J. Stone, A. Dullweber, M. Hodges, P. Popelier and D. J. Wales, *Orient: a program for studying interactions between molecules, version 3.2*, University of Cambridge, Cambridge, 1997.
